# Supplementary material
Source: publisher site journal article supplement (https://www.dovepress.com/article/268574)
Supplement: Supplementary file 1 [file get_supplementary_file.php]

Appendix A1

# Items level analysis of core elements of outpatient antibiotics stewardship for facilities (Table A1)

# Items level analysis of core elements of outpatient antibiotics stewardship for clinicians (Table A2)

1. **STROBE Statement—Checklist of items that should be included in reports of *cross-sectional studies* (Table A3)**
2. **Individual hospital response for facilities’ indicators (Table A4)**
3. **Individual hospital response for clinicians’ indicators (Table A5)**

# (Table A1)

Table A1 Items level analysis of core elements of outpatient antibiotics stewardship for facilities

|  | Statements | Mean (SD) | Subgroup Analysis | | |
| --- | --- | --- | --- | --- | --- |
| Public Hospitals Mean | Private Hospitals Mean | t (p-value) |
| Commitment | Can your facility demonstrate dedication to and accountability for optimizing antibiotic prescribing and patient safety related to antibiotics? | 0.74  (0.45) | 0.73  (0.46) | 0.74  (0.45) | -0.12  (0.82) |
| Identify a single leader to direct antibiotic stewardship activities within a facility. | 0.26  (0.45) | 0.14  (0.35) | 0.35  (0.49) | -1.90  (0.00) |
| Include antibiotic stewardship-related duties in position descriptions or job evaluation criteria. | 0.19  (0.40) | 0.18  (0.40) | 0.19  (0.40) | -0.11  (0.83) |
| Communicate with all clinic staff members to set patient expectations. | 0.40  (0.50) | 0.45  (0.51) | 0.35  (0.49) | 0.72  (0.23) |
| Action | Has your facility implemented at least one policy or practice to improve antibiotic prescribing? | 0.58  (0.50) | 0.64  (0.49) | 0.55  (0.51) | 0.63  (0.22) |
| Provide communications skills training for clinicians. | 0.36  (0.48) | 0.36  (0.49) | 0.35  (0.49) | 0.07  (0.90) |
| Require explicit written justification in the medical record for non-recommended antibiotic prescribing. | 0.11  (0.32) | 0.05  (0.21) | 0.16  (0.37) | -1.43  (0.01) |
| Provide support for clinical decisions. | 0.28  (0.46) | 0.32  (0.48) | 0.26  (0.45) | 0.47  (0.36) |
| Use call centers, nurse hotlines, or pharmacist consultations as triage systems to prevent unnecessary visits. | 0.08  (0.27) | 0.05  (0.21) | 0.10  (0.30) | -0.69  (0.16) |
| Tracking and Reporting | Does your facility monitor at least one aspect of antibiotic prescribing? | 0.45  (0.50) | 0.32  (0.48) | 0.55  (0.51) | -1.67  (0.07) |
| Track and report antibiotic prescribing for one or more high-priority conditions. | 0.34  (0.48) | 0.27  (0.46) | 0.39  (0.50) | -0.86  (0.08) |
| Track and report the percentage of all visits leading to antibiotic prescriptions. | 0.04  (0.20) | 0  (0) | 0.06  (0.25) | -1.44  (0.01) |
| (If already tracking and reporting one of the above) Track and report, at the level of a health care system, complications of antibiotic use and antibiotic resistance trends among common outpatient bacterial pathogens. | 0.04  (0.20) | 0  (0) | 0.06  (0.25) | -1.44  (0.01) |
| Assess and share performance on quality measures and established reduction goals addressing appropriate antibiotic prescribing from health care plans and payers. | 0.06  (0.23) | 0.05  (0.21) | 0.06  (0.25) | -0.29  (0.56) |
| Education and Expertise | Does your facility provide resources to clinicians and patients on evidence-based antibiotic prescribing? | 0.74  (0.45) | 0.68  (0.48) | 0.77  (0.43) | -0.74  (0.16) |
| Provide face-to-face educational training (academic detailing). | 0.32  (0.47) | 0.27  (0.46) | 0.35  (0.49) | -0.62  (0.21) |
| Provide continuing education activities for clinicians. | 0.36  (0.48) | 0.27  (0.46) | 0.42  (0.50) | -1.11  (0.03) |
| Ensure timely access to persons with expertise. | 0.25  (0.43) | 0.18  (0.40) | 0.29  (0.46) | -0.89  (0.07) |

# (Table A2)

Table A2Items level analysis of core elements of outpatient antibiotics stewardship for clinicians

|  | Statements | Mean (SD) | Subgroup Analysis | | |
| --- | --- | --- | --- | --- | --- |
| Public Hospitals Mean  (SD) | Private Hospitals Mean  (SD) | t (p-value) |
| Commitment | Can you demonstrate dedication to and accountability for optimizing antibiotic prescribing and patient safety related to antibiotics? | 0.58  (0.50) | 0.64  (0.50) | 0.55  (0.51) | 0.63  (0.22) |
| Write and display public commitments in support of antibiotic stewardship. | 0.58  (0.50) | 0.64  (0.50) | 0.55  (0.51) | 0.63  (0.22) |
| Action | Have you implemented at least one practice to improve antibiotic prescribing? | 0.75  (0.43) | 0.68  (0.48) | 0.81  (0.40) | -1.0  (0.05) |
| Use evidence-based diagnostic criteria and treatment recommendations. | 0.51  (0.51) | 0.64  (0.50) | 0.42  (0.50) | 1.56  (0.42) |
| Use delayed prescribing practices or watchful waiting, when appropriate. | 0.34  (0.48) | 0.18  (0.40) | 0.45  (0.51) | -2.18  (0.00) |
| Tracking and Reporting | Do you monitor at least one aspect of antibiotic prescribing? | 0.77  (0.42) | 0.68  (0.48) | 0.84  (0.37) | -1.29  (0.01) |
| Self-evaluate antibiotic prescribing practices. | 0.38  (0.49) | 0.36  (0.49) | 0.39  (0.50) | -0.17  (0.73) |
| Participate in continuing medical education and quality improvement activities to track and improve antibiotic prescribing. | 0.49  (0.51) | 0.41  (0.50) | 0.55  (0.51) | -0.99  (0.55) |
| Education and Expertise | Do you provide education to patients and seek out continuing education on antibiotic prescribing? | 0.83  (0.38) | 0.82  (0.40) | 0.84  (0.37) | -0.19  (0.70) |
| Use effective communication strategies to educate patients about when antibiotics are and are not needed. | 0.43  (0.50) | 0.36  (0.50) | 0.48  (0.51) | -0.86  (0.14) |
| Educate about the potential harms of antibiotic treatment. | 0.66  (0.48) | 0.64  (0.49) | 0.68  (0.48) | -0.31  (0.56) |
| Provide patient education materials. | 0.09  (0.30) | 0  (0.16) | 0  (0.37) | -2.40  (0.00) |

# c) (Table A3)

**STROBE Statement—Checklist of items that should be included in reports of *cross-sectional studies***

|  | Item No | Recommendation | Page No |
| --- | --- | --- | --- |
| **Title and abstract** | 1 | (*a*) Indicate the study’s design with a commonly used term in the title or the abstract | 1 |
| (*b*) Provide in the abstract an informative and balanced summary of what was done and what was found | 2 |
| Introduction | | | |
| Background/rationale | 2 | Explain the scientific background and rationale for the investigation being reported | 4 |
| Objectives | 3 | State specific objectives, including any prespecified hypotheses | 6 |
| Methods | | | |
| Study design | 4 | Present key elements of study design early in the paper | 6-8 |
| Setting | 5 | Describe the setting, locations, and relevant dates, including periods of recruitment, exposure, follow-up, and data collection | 7, 8 |
| Participants | 6 | (*a*) Give the eligibility criteria, and the sources and methods of selection of participants | 9 |
| Variables | 7 | Clearly define all outcomes, exposures, predictors, potential confounders, and effect modifiers. Give diagnostic criteria, if applicable | 9 |
| Data sources/ measurement | 8* | For each variable of interest, give sources of data and details of methods of assessment (measurement). Describe comparability of assessment methods if there is more than one group | 9 |
| Bias | 9 | Describe any efforts to address potential sources of bias | 19 |
| Study size | 10 | Explain how the study size was arrived at | 7 |
| Quantitative variables | 11 | Explain how quantitative variables were handled in the analyses. If applicable, describe which groupings were chosen and why | 9 |
| Statistical methods | 12 | (*a*) Describe all statistical methods, including those used to control for confounding | 9 |
| (*b*) Describe any methods used to examine subgroups and interactions | 10 |
| (*c*) Explain how missing data were addressed | 10 |
| (*d*) If applicable, describe analytical methods taking account of sampling strategy | NA |
| (*e*) Describe any sensitivity analyses | NA |
| Results | | | |
| Participants | 13* | (a) Report numbers of individuals at each stage of study—eg numbers potentially eligible, examined for eligibility, confirmed eligible, included in the study, completing follow-up, and analysed | 9, 10 |
| (b) Give reasons for non-participation at each stage | 10 |
| (c) Consider use of a flow diagram | NA |
| Descriptive data | 14* | (a) Give characteristics of study participants (eg demographic, clinical, social) and information on exposures and potential confounders | 10 |
| (b) Indicate number of participants with missing data for each variable of interest | - |
| Outcome data | 15* | Report numbers of outcome events or summary measures | 10-14 |
| Main results | 16 | (*a*) Give unadjusted estimates and, if applicable, confounder-adjusted estimates and their precision (eg, 95% confidence interval). Make clear which confounders were adjusted for and why they were included | NA |
| (*b*) Report category boundaries when continuous variables were categorized | 8 |
| (*c*) If relevant, consider translating estimates of relative risk into absolute risk for a meaningful time period | NA |
| Other analyses | 17 | Report other analyses done—eg analyses of subgroups and interactions, and sensitivity analyses | 12, 14 |
| Discussion | | | |
| Key results | 18 | Summarise key results with reference to study objectives | 10 |
| Limitations | 19 | Discuss limitations of the study, taking into account sources of potential bias or imprecision. Discuss both direction and magnitude of any potential bias | 19 |
| Interpretation | 20 | Give a cautious overall interpretation of results considering objectives, limitations, multiplicity of analyses, results from similar studies, and other relevant evidence | 17 |
| Generalisability | 21 | Discuss the generalisability (external validity) of the study results | 17 |
| Other information | | | |
| Funding | 22 | Give the source of funding and the role of the funders for the present study and, if applicable, for the original study on which the present article is based | 21 |

*Give information separately for exposed and unexposed groups.

**Note:** An Explanation and Elaboration article discusses each checklist item and gives methodological background and published examples of transparent reporting. The STROBE checklist is best used in conjunction with this article (freely available on the Web sites of PLoS Medicine at http://www.plosmedicine.org/, Annals of Internal Medicine at http://www.annals.org/, and Epidemiology at http://www.epidem.com/). Information on the STROBE Initiative is available at www.strobe-statement.org.

# d) (Table A4)

Table A4 Individual hospital response for facilities’ indicators

| Sr.no | Hospitals | Type of Hospital | Commitment | | | | Action | | | | | Tracking and Reporting | | | | | Education and Expertise | | | |
| --- | --- | --- | --- | --- | --- | --- | --- | --- | --- | --- | --- | --- | --- | --- | --- | --- | --- | --- | --- | --- |
| C1 | C2 | C3 | C4 | A1 | A2 | A3 | A4 | A5 | TR1 | TR2 | TR3 | TR4 | TR5 | E1 | E2 | E3 | E4 |
|  | H1 | Public | Yes | Yes | Yes | No | Yes | No | No | Yes | No | Yes | Yes | No | No | No | Yes | No | No | Yes |
|  | H2 | Private | Yes | No | No | Yes | Yes | Yes | No | No | No | Yes | Yes | No | No | No | Yes | Yes | No | No |
|  | H3 | Public | Yes | No | No | Yes | Yes | Yes | No | No | No | Yes | Yes | No | No | No | Yes | Yes | No | No |
|  | H4 | Private | Yes | No | Yes | No | Yes | Yes | Yes | Yes | Yes | No | No | No | No | No | Yes | Yes | No | No |
|  | H5 | Private | No | No | No | No | Yes | Yes | Yes | Yes | Yes | No | No | No | No | No | No | No | No | No |
|  | H6 | Public | Yes | No | No | Yes | No | No | No | No | No | Yes | Yes | No | No | No | Yes | Yes | No | No |
|  | H7 | Public | No | No | No | No | No | No | No | No | No | No | No | No | No | No | Yes | No | No | Yes |
|  | H8 | Public | Yes | No | Yes | No | Yes | No | No | Yes | No | Yes | No | No | No | Yes | Yes | Yes | No | No |
|  | H9 | Private | Yes | Yes | Yes | No | Yes | No | No | Yes | No | No | No | No | No | No | Yes | Yes | Yes | No |
|  | H10 | Private | No | No | No | No | No | No | No | No | No | Yes | Yes | No | No | No | No | No | No | No |
|  | H11 | Public | Yes | Yes | No | No | Yes | Yes | No | No | No | No | No | No | No | No | Yes | Yes | No | No |
|  | H12 | Private | Yes | Yes | No | No | No | No | No | No | No | No | No | No | No | No | Yes | Yes | Yes | Yes |
|  | H13 | Public | Yes | No | No | Yes | No | No | No | No | No | No | No | No | No | No | No | No | No | No |
|  | H14 | Private | Yes | Yes | No | No | Yes | Yes | No | No | No | No | No | No | No | No | Yes | No | Yes | No |
|  | H15 | Public | Yes | Yes | No | No | Yes | No | No | Yes | Yes | No | No | No | No | No | No | No | No | No |
|  | H16 | Public | Yes | No | No | Yes | No | No | No | No | No | No | No | No | No | No | No | No | No | No |
|  | H17 | Public | Yes | No | No | Yes | Yes | Yes | No | No | No | Yes | Yes | No | No | No | Yes | No | Yes | No |
|  | H18 | Public | No | No | No | No | Yes | Yes | No | No | No | Yes | Yes | No | No | No | Yes | Yes | No | No |
|  | H19 | Public | No | No | No | No | No | No | No | No | No | No | No | No | No | No | No | No | No | No |
|  | H20 | Private | Yes | Yes | No | No | No | No | No | No | No | Yes | Yes | No | No | No | Yes | No | No | Yes |
|  | H21 | Public | No | No | No | No | Yes | No | No | Yes | No | No | No | No | No | No | No | No | No | No |
|  | H22 | Public | No | No | No | No | No | No | No | No | No | No | No | No | No | No | Yes | Yes | No | No |
|  | H23 | Public | Yes | No | No | Yes | Yes | No | No | Yes | No | No | No | No | No | No | Yes | No | Yes | No |
|  | H24 | Public | Yes | No | No | Yes | Yes | Yes | Yes | No | No | No | No | No | No | No | Yes | No | Yes | No |
|  | H25 | Public | Yes | No | No | Yes | Yes | Yes | No | No | No | No | No | No | No | No | Yes | No | Yes | No |
|  | H26 | Private | Yes | Yes | No | No | No | No | No | No | No | No | No | No | No | No | Yes | No | Yes | No |
|  | H27 | Private | Yes | No | No | Yes | Yes | Yes | No | No | No | No | No | No | No | No | Yes | No | Yes | No |
|  | H28 | Private | No | No | No | No | No | No | No | No | No | No | No | No | No | No | Yes | Yes | No | No |
|  | H29 | Private | Yes | No | No | Yes | No | No | No | No | No | Yes | Yes | No | No | No | Yes | No | Yes | No |
|  | H30 | Private | Yes | Yes | No | No | Yes | No | No | Yes | No | No | No | No | No | No | Yes | No | Yes | No |
|  | H31 | Public | Yes | No | Yes | No | Yes | Yes | No | Yes | No | Yes | Yes | No | No | No | Yes | No | Yes | Yes |
|  | H32 | Private | No | No | No | No | No | No | No | No | No | No | No | No | No | No | No | No | No | No |
|  | H33 | Private | Yes | No | Yes | No | Yes | No | No | Yes | No | No | No | No | No | No | Yes | No | No | Yes |
|  | H34 | Private | Yes | No | No | Yes | No | No | No | No | No | Yes | No | No | No | Yes | Yes | Yes | No | No |
|  | H35 | Private | Yes | Yes | No | Yes | Yes | Yes | No | No | No | Yes | Yes | No | No | No | Yes | No | Yes | Yes |
|  | H36 | Public | No | No | No | No | No | No | No | No | No | No | No | No | No | No | No | No | No | No |
|  | H37 | Private | Yes | No | Yes | Yes | Yes | Yes | Yes | Yes | Yes | Yes | Yes | No | No | Yes | Yes | Yes | Yes | Yes |
|  | H38 | Private | Yes | Yes | Yes | No | Yes | No | Yes | No | No | Yes | Yes | No | No | No | Yes | Yes | No | No |
|  | H39 | Private | Yes | No | No | Yes | Yes | No | No | Yes | No | No | No | No | No | No | No | No | No | No |
|  | H40 | Public | Yes | No | Yes | No | Yes | Yes | No | No | No | No | No | No | No | No | Yes | No | Yes | No |
|  | H41 | Private | Yes | No | No | Yes | No | No | No | No | No | Yes | Yes | No | No | No | No | No | No | No |
|  | H42 | Private | Yes | No | No | Yes | Yes | Yes | No | Yes | No | No | No | No | No | No | Yes | Yes | Yes | No |
|  | H43 | Public | Yes | No | No | Yes | Yes | No | No | Yes | No | No | No | No | No | No | Yes | No | No | Yes |
|  | H44 | Private | No | No | No | No | No | No | No | No | No | Yes | Yes | No | No | No | Yes | Yes | Yes | Yes |
|  | H45 | Public | Yes | No | No | Yes | No | No | No | No | No | No | No | No | No | No | No | No | No | No |
|  | H46 | Private | Yes | No | Yes | No | No | No | No | No | No | No | No | No | No | No | Yes | Yes | No | No |
|  | H47 | Private | Yes | Yes | No | No | Yes | No | Yes | No | No | Yes | No | Yes | No | No | Yes | No | No | Yes |
|  | H48 | Private | Yes | Yes | No | Yes | Yes | Yes | No | No | No | Yes | Yes | No | No | No | Yes | No | No | Yes |
|  | H49 | Private | Yes | Yes | No | No | No | No | No | No | No | Yes | No | Yes | No | No | Yes | No | No | Yes |
|  | H50 | Private | Yes | No | No | Yes | Yes | Yes | No | No | No | Yes | Yes | No | No | No | Yes | No | Yes | No |
|  | H51 | Private | No | No | No | No | No | No | No | No | No | Yes | No | No | Yes | No | No | No | No | No |
|  | H52 | Private | No | No | No | No | Yes | Yes | No | No | No | Yes | Yes | No | No | No | Yes | No | Yes | No |
|  | H53 | Private | No | No | No | No | No | No | No | No | No | Yes | No | No | Yes | No | No | No | No | No |

C1, C2, C3, C4, A1, A2, A3, A4, A5, TR1, TR2, TR3, TR4, TR5, E1, E2, E3, E4= All of these refer to survey statements for various core elements for facilities

# e) (Table A5)

Table A5 Individual hospital response for clinicians’ indicators

| Sr.no. | Hospitals | Type of Hospital | Commitment | | Action | | | Tracking and Reporting | | | Education and Expertise | | | |
| --- | --- | --- | --- | --- | --- | --- | --- | --- | --- | --- | --- | --- | --- | --- |
| C1 | C2 | A1 | A2 | A3 | TR1 | TR2 | TR3 | E1 | E2 | E3 | E4 |
|  | H1 | Public | No | No | No | No | No | No | No | No | Yes | Yes | Yes | No |
|  | H2 | Private | No | No | Yes | Yes | Yes | Yes | No | Yes | Yes | Yes | Yes | No |
|  | H3 | Public | Yes | Yes | Yes | Yes | No | Yes | Yes | No | Yes | No | Yes | No |
|  | H4 | Private | Yes | Yes | Yes | No | Yes | No | No | No | Yes | No | Yes | No |
|  | H5 | Private | No | No | Yes | Yes | No | No | No | No | No | No | No | No |
|  | H6 | Public | Yes | Yes | No | No | No | Yes | Yes | No | Yes | Yes | No | No |
|  | H7 | Public | Yes | Yes | Yes | Yes | No | No | No | No | Yes | Yes | No | No |
|  | H8 | Public | No | No | Yes | No | Yes | Yes | Yes | No | Yes | No | Yes | No |
|  | H9 | Private | Yes | Yes | Yes | No | Yes | Yes | Yes | Yes | Yes | Yes | Yes | No |
|  | H10 | Private | No | No | Yes | Yes | No | Yes | Yes | Yes | Yes | Yes | Yes | No |
|  | H11 | Public | Yes | Yes | Yes | Yes | No | Yes | Yes | No | Yes | Yes | No | No |
|  | H12 | Private | Yes | Yes | Yes | No | Yes | Yes | Yes | No | Yes | Yes | Yes | No |
|  | H13 | Public | Yes | Yes | Yes | Yes | No | Yes | Yes | Yes | Yes | No | Yes | No |
|  | H14 | Private | Yes | Yes | Yes | No | Yes | Yes | No | Yes | Yes | Yes | Yes | Yes |
|  | H15 | Public | Yes | Yes | Yes | Yes | Yes | Yes | No | Yes | Yes | No | Yes | No |
|  | H16 | Public | Yes | Yes | Yes | Yes | Yes | Yes | Yes | No | No | No | No | No |
|  | H17 | Public | Yes | Yes | No | No | No | No | No | No | Yes | No | Yes | No |
|  | H18 | Public | No | No | No | No | No | Yes | No | Yes | Yes | No | Yes | No |
|  | H19 | Public | No | No | No | No | No | No | No | No | No | No | No | No |
|  | H20 | Private | Yes | Yes | Yes | No | Yes | Yes | Yes | No | Yes | Yes | No | No |
|  | H21 | Public | No | No | No | No | No | Yes | No | Yes | Yes | No | Yes | No |
|  | H22 | Public | No | No | No | No | No | No | No | No | Yes | No | Yes | No |
|  | H23 | Public | Yes | Yes | Yes | Yes | No | Yes | No | Yes | Yes | Yes | Yes | No |
|  | H24 | Public | No | No | Yes | Yes | Yes | Yes | No | Yes | Yes | Yes | Yes | No |
|  | H25 | Public | Yes | Yes | Yes | Yes | No | Yes | No | Yes | Yes | No | Yes | No |
|  | H26 | Private | No | No | Yes | Yes | No | Yes | No | Yes | Yes | No | Yes | No |
|  | H27 | Private | Yes | Yes | Yes | No | Yes | Yes | No | Yes | Yes | Yes | Yes | No |
|  | H28 | Private | No | No | No | No | No | No | No | No | Yes | No | Yes | No |
|  | H29 | Private | No | No | Yes | Yes | No | Yes | No | Yes | No | No | No | No |
|  | H30 | Private | Yes | Yes | Yes | No | Yes | Yes | No | Yes | Yes | Yes | Yes | Yes |
|  | H31 | Public | Yes | Yes | Yes | Yes | No | Yes | Yes | Yes | Yes | Yes | Yes | No |
|  | H32 | Private | No | No | No | No | No | Yes | Yes | No | Yes | No | Yes | No |
|  | H33 | Private | No | No | Yes | No | Yes | Yes | Yes | No | Yes | Yes | No | No |
|  | H34 | Private | Yes | Yes | No | No | No | Yes | No | Yes | Yes | No | Yes | Yes |
|  | H35 | Private | Yes | Yes | Yes | Yes | Yes | Yes | Yes | Yes | Yes | Yes | No | No |
|  | H36 | Public | Yes | Yes | Yes | Yes | No | Yes | No | Yes | Yes | Yes | No | No |
|  | H37 | Private | Yes | Yes | Yes | Yes | No | Yes | No | Yes | Yes | Yes | Yes | Yes |
|  | H38 | Private | No | No | No | No | No | Yes | Yes | No | Yes | No | Yes | No |
|  | H39 | Public | No | No | Yes | Yes | No | No | No | No | Yes | No | Yes | No |
|  | H40 | Private | Yes | Yes | Yes | No | Yes | Yes | No | Yes | Yes | No | Yes | No |
|  | H41 | Private | Yes | Yes | Yes | No | Yes | No | No | No | No | No | No | No |
|  | H42 | Private | No | No | No | No | No | No | No | No | No | No | No | No |
|  | H43 | Public | Yes | Yes | Yes | Yes | No | Yes | Yes | No | No | No | No | No |
|  | H44 | Private | No | No | No | No | No | Yes | Yes | No | Yes | Yes | Yes | Yes |
|  | H45 | Public | Yes | Yes | Yes | Yes | No | No | No | No | No | No | No | No |
|  | H46 | Private | Yes | Yes | Yes | Yes | No | Yes | No | Yes | Yes | Yes | Yes | No |
|  | H47 | Private | No | No | Yes | Yes | No | Yes | Yes | No | Yes | No | Yes | No |
|  | H48 | Private | Yes | Yes | Yes | Yes | No | Yes | Yes | No | Yes | No | Yes | No |
|  | H49 | Private | No | No | Yes | Yes | No | Yes | Yes | No | Yes | No | Yes | No |
|  | H50 | Private | No | No | Yes | Yes | No | Yes | No | Yes | Yes | Yes | No | No |
|  | H51 | Private | Yes | Yes | Yes | No | Yes | Yes | No | Yes | No | No | No | No |
|  | H52 | Private | Yes | Yes | Yes | Yes | No | Yes | No | Yes | Yes | No | Yes | No |
|  | H53 | Private | Yes | Yes | Yes | No | Yes | Yes | No | Yes | Yes | Yes | No | No |

C1, C2, C3, C4, A1, A2, A3, A4, A5, TR1, TR2, TR3, TR4, TR5, E1, E2, E3, E4= All of these refer to survey statements for various core elements for clinicians
